# Supplementary material
Source: PubMed Central journal article supplement (PMC8545656)
Supplement: NIHMS1736620-supplement-Table_S1.pdf [file NIHMS1736620-supplement-Table_S1.pdf]

| <b>Figure</b> | <b>Panel</b> | <b>Genotype</b>                                                                                            |
|---------------|--------------|------------------------------------------------------------------------------------------------------------|
| Figure 1      | D            | <i>hsFLP, UAS-mCD8-GFP/+; FRTG13, AM29-GAL4, UAS-mCD8-GFP/FRTG13, tubP-GAL80</i>                           |
|               | E            | <i>AM29-GAL4/UAS-mCD8-GFP</i>                                                                              |
| Figure 2      | B–D          | <i>hsFLP/pebbled-GAL4;; UAS-FRT<sup>100</sup>-stop-FRT<sup>100</sup>-mCD8-GFP</i>                          |
| Figure 3      | A–G          | <i>hsFLP/pebbled-GAL4;; UAS-FRT<sup>100</sup>-stop-FRT<sup>100</sup>-mCD8-GFP</i>                          |
| Figure 4      | B–K          | <i>hsFLP, tubP-GAL80, FRT19A/pebbled-GAL4, FRT19A;; UAS-3XHalo7-CAAX/+</i>                                 |
| Figure 5      | A, B         | <i>hsFLP, tubP-GAL80, FRT19A/pebbled-GAL4, FRT19A;; UAS-utABD-GFP/UAS-3XHalo7-CAAX</i>                     |
|               | C, D         | <i>hsFLP, tubP-GAL80, FRT19A/pebbled-GAL4, FRT19A;; UAS-<math>\alpha</math>Tub84B-GFP/UAS-3XHalo7-CAAX</i> |
|               | E, F         | <i>hsFLP, tubP-GAL80, FRT19A/pebbled-GAL4, FRT19A;; UAS-EB1-GFP/UAS-3XHalo7-CAAX</i>                       |
| Figure 6      | B, C         | <i>hsFLP/pebbled-GAL4;; UAS-FRT<sup>100</sup>-stop-FRT<sup>100</sup>-mCD8-GFP</i>                          |
|               | E            | <i>AM29-GAL4/UAS-mCD8-GFP</i>                                                                              |
| Figure 7      | A, B         | <i>hsFLP, UAS-mCD8-GFP/+; FRTG13, GH146-GAL4, UAS-mCD8-GFP/FRTG13, tubP-GAL80</i>                          |
|               | C–F          | <i>split15-GAL4/UAS-mCD8-GFP</i>                                                                           |
| Figure S1     | A, B         | <i>hsFLP, UAS-mCD8-GFP/+; FRTG13, AM29-GAL4, UAS-mCD8-GFP/FRTG13, tubP-GAL80</i>                           |
|               | C            | <i>pebbled-GAL4/UAS-mCD8-GFP</i>                                                                           |
|               | D            | <i>hsFLP/+; AM29-GAL4/+; UAS-FRT<sup>10</sup>-stop-FRT<sup>10</sup>-mCD8-GFP</i>                           |
| Figure S2     | A            | <i>hsFLP/pebbled-GAL4;; UAS-FRT<sup>100</sup>-stop-FRT<sup>100</sup>-mCD8-GFP</i>                          |
| Figure S3     | C, D         | <i>hsFLP/pebbled-GAL4;; UAS-FRT<sup>100</sup>-stop-FRT<sup>100</sup>-mCD8-GFP</i>                          |
| Figure S4     | A, F, G      | <i>hsFLP/pebbled-GAL4;; UAS-FRT<sup>100</sup>-stop-FRT<sup>100</sup>-mCD8-GFP</i>                          |
| Figure S5     | C, F, G      | <i>hsFLP/pebbled-GAL4;; UAS-FRT<sup>100</sup>-stop-FRT<sup>100</sup>-mCD8-GFP</i>                          |
| Figure S6     | A, B, G      | <i>hsFLP, tubP-GAL80, FRT19A/pebbled-GAL4, FRT19A;; UAS-3XHalo7-CAAX/+</i>                                 |
|               | H            | <i>hsFLP, tubP-GAL80, FRT19A/pebbled-GAL4, FRT19A;; UAS-<math>\alpha</math>Tub84B-GFP/UAS-3XHalo7-CAAX</i> |
|               | K, I         | <i>hsFLP, tubP-GAL80, FRT19A/pebbled-GAL4, FRT19A;; UAS-utABD-GFP/UAS-3XHalo7-CAAX</i>                     |
|               | L, J         | <i>hsFLP, tubP-GAL80, FRT19A/pebbled-GAL4, FRT19A;; UAS-EB1-GFP/UAS-3XHalo7-CAAX</i>                       |
|               |              |                                                                                                            |
| Figure S7     | D            | <i>split7-GAL4/UAS-mCD8-GFP</i>                                                                            |
|               | E, F         | <i>Mz19-GAL4/vvl-FLP; UAS-mCD8-FRT-GFP-FRT-RFP</i>                                                         |
