# Supplementary material
Source: PubMed Central journal article supplement (PMC8545656)

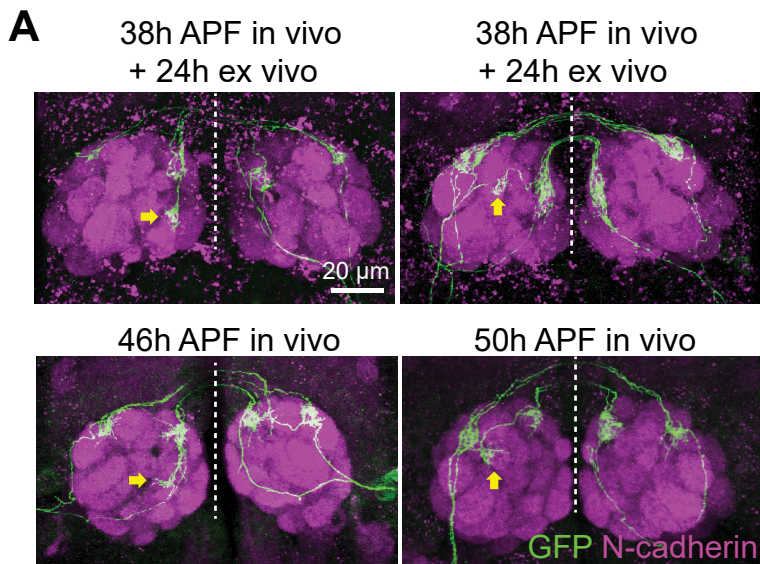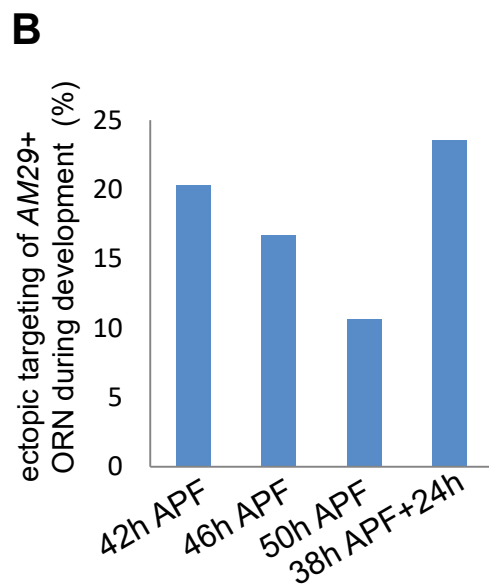

**C**  
*pebbled-GAL4, UAS-mCD8-GFP* (all ORNs)

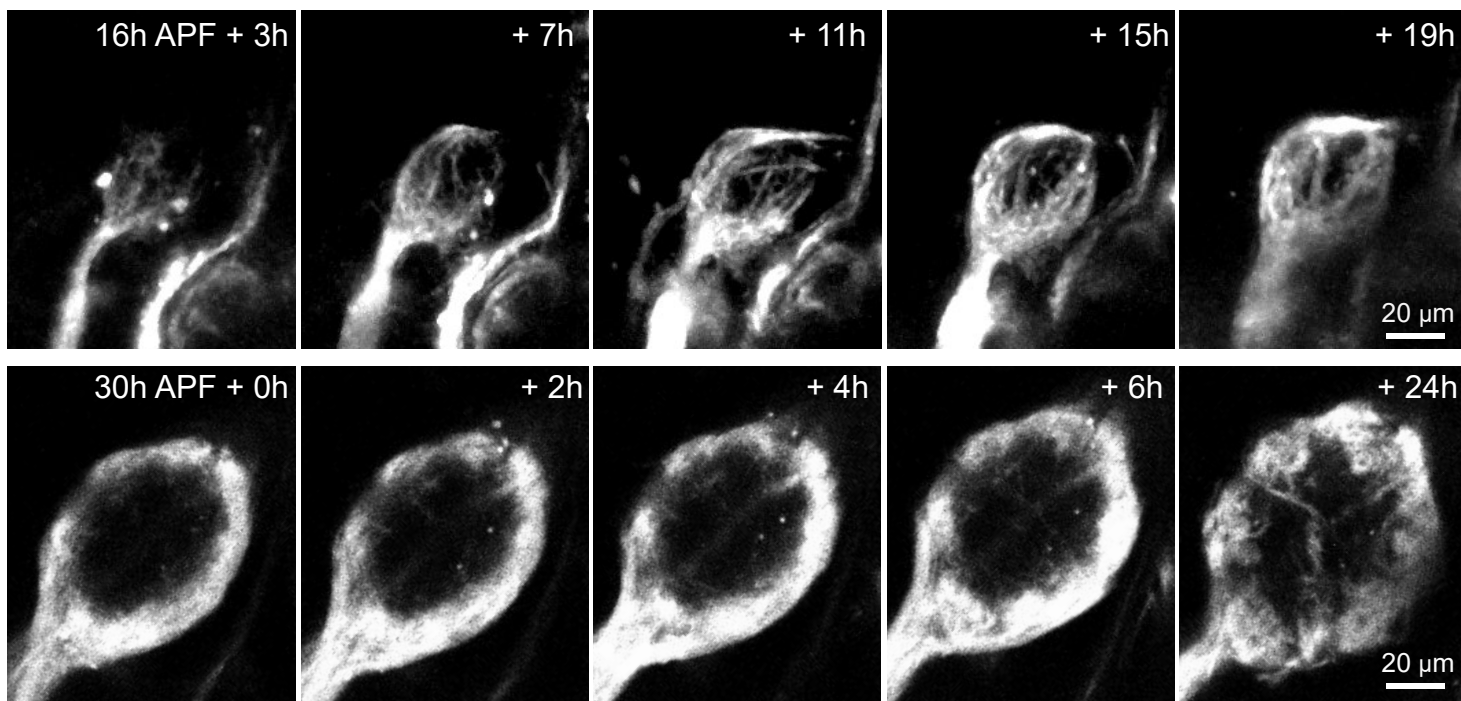

**D**  
*hsFLP/+; AM29-GAL4/+; UAS-FRT<sup>10</sup>-stop-FRT<sup>10</sup>-mCD8-GFP/+*

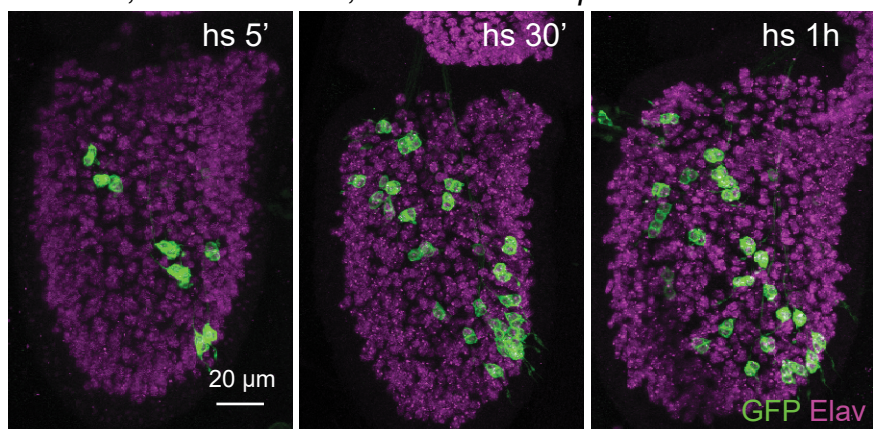

Supplement: NIHMS1736620-supplement-1.pdf [file NIHMS1736620-supplement-1.pdf]

A

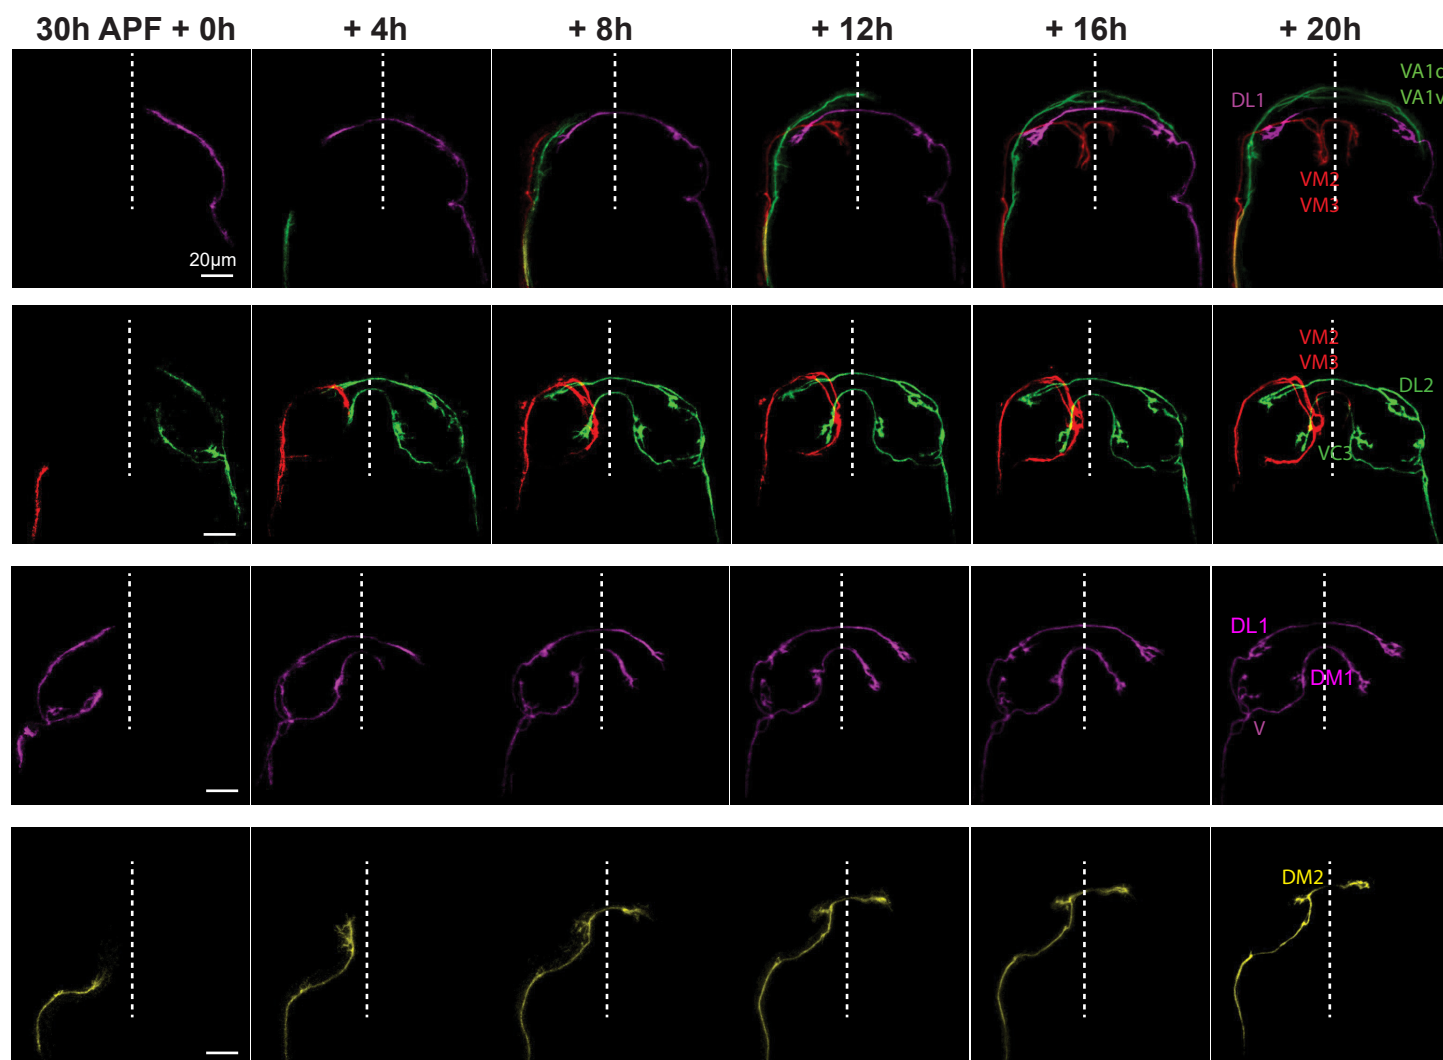

B

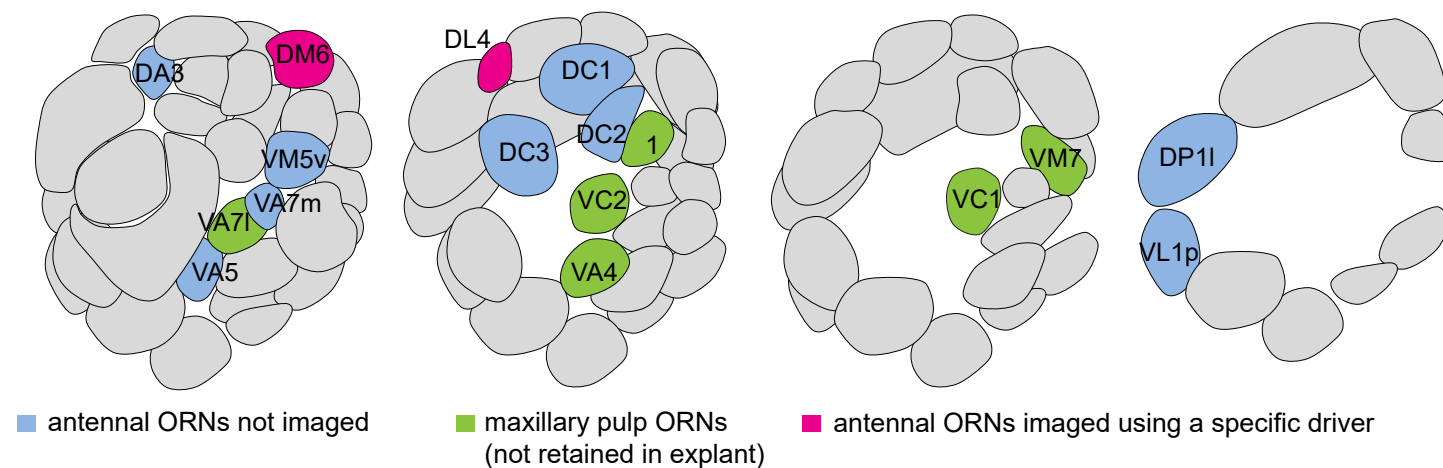

Supplement: NIHMS1736620-supplement-2.pdf [file NIHMS1736620-supplement-2.pdf]

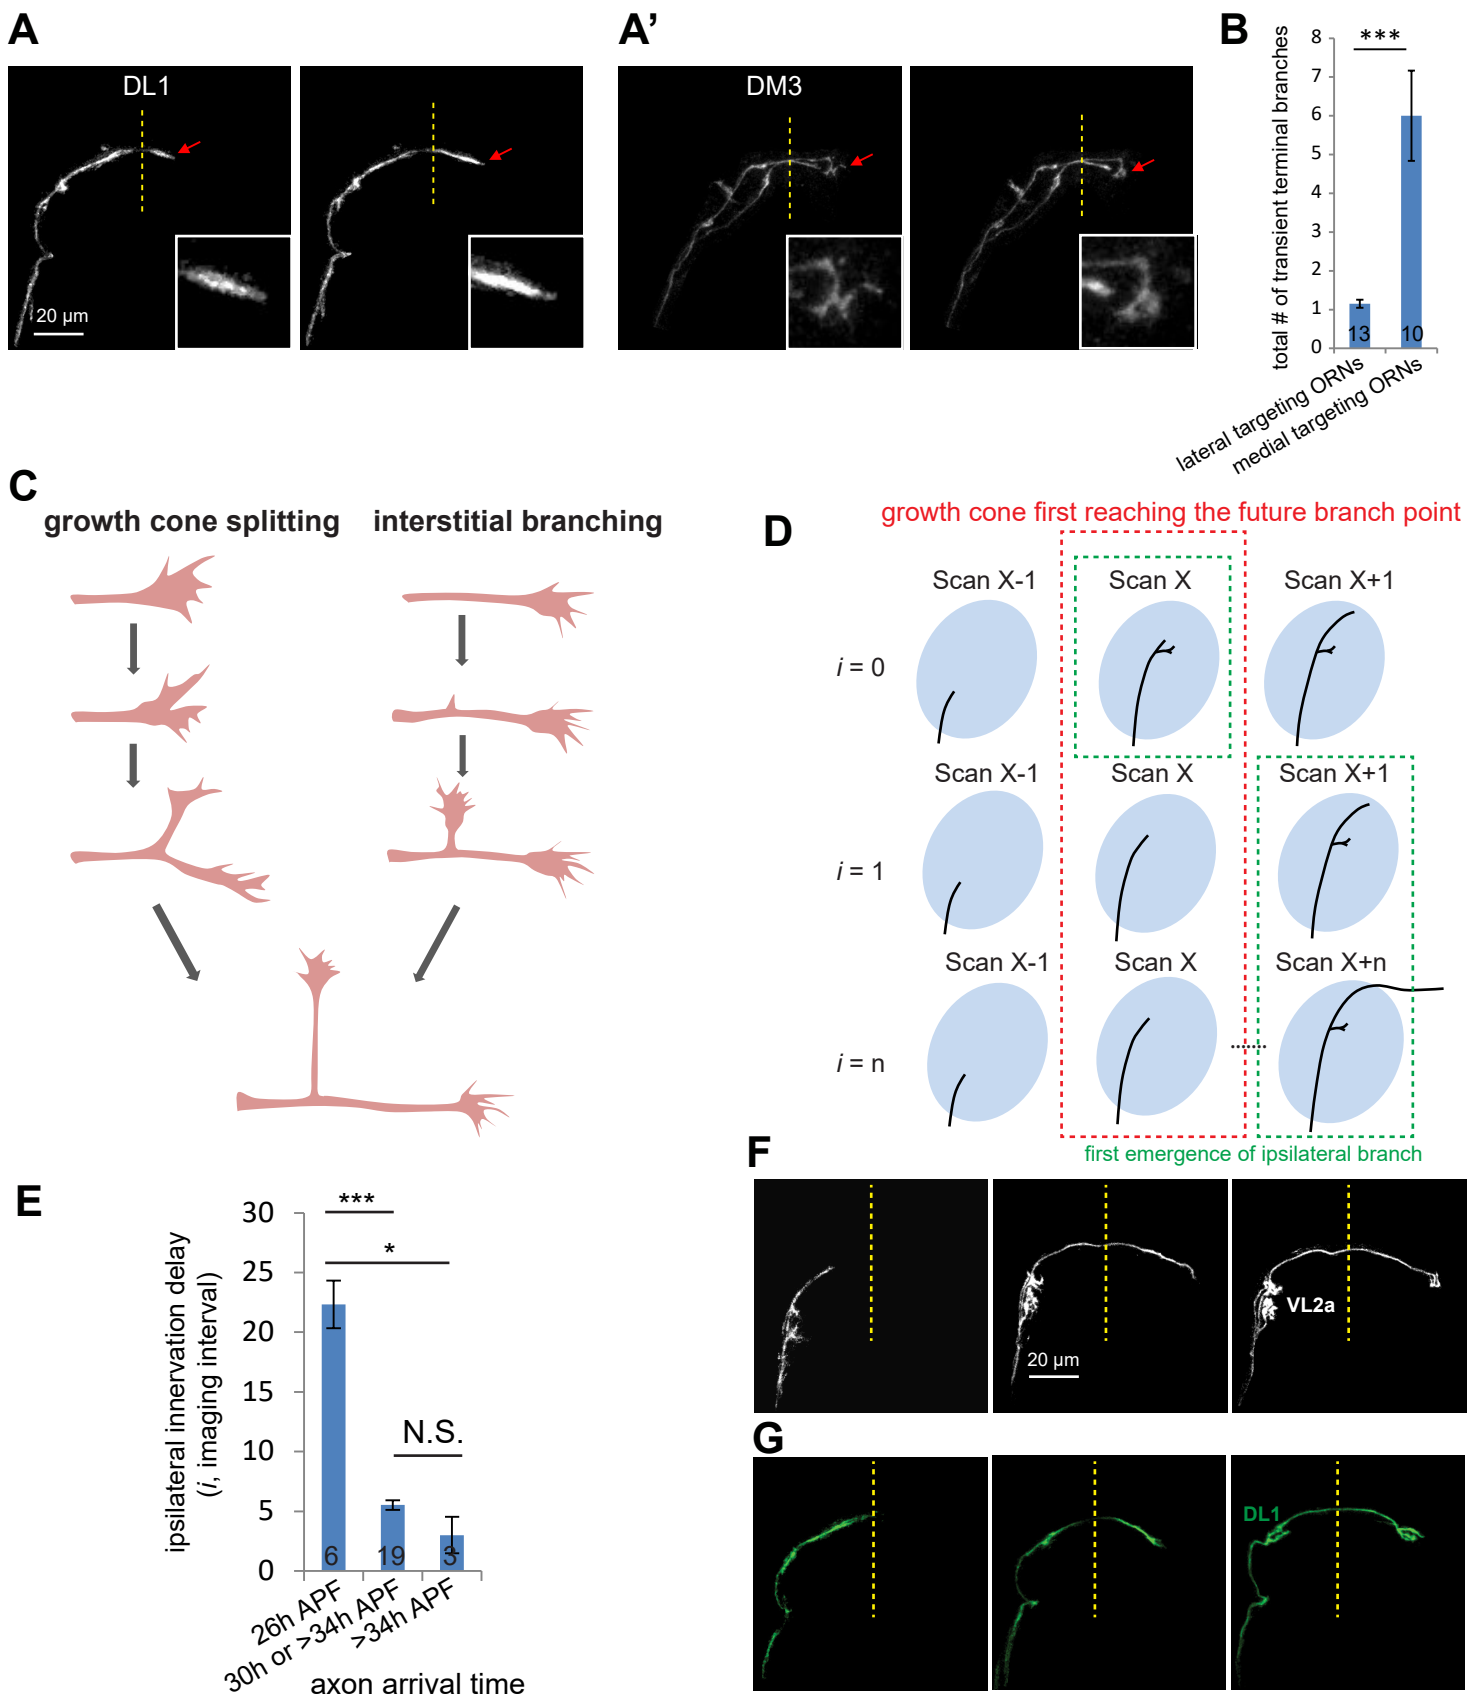

Supplement: NIHMS1736620-supplement-4.pdf [file NIHMS1736620-supplement-4.pdf]

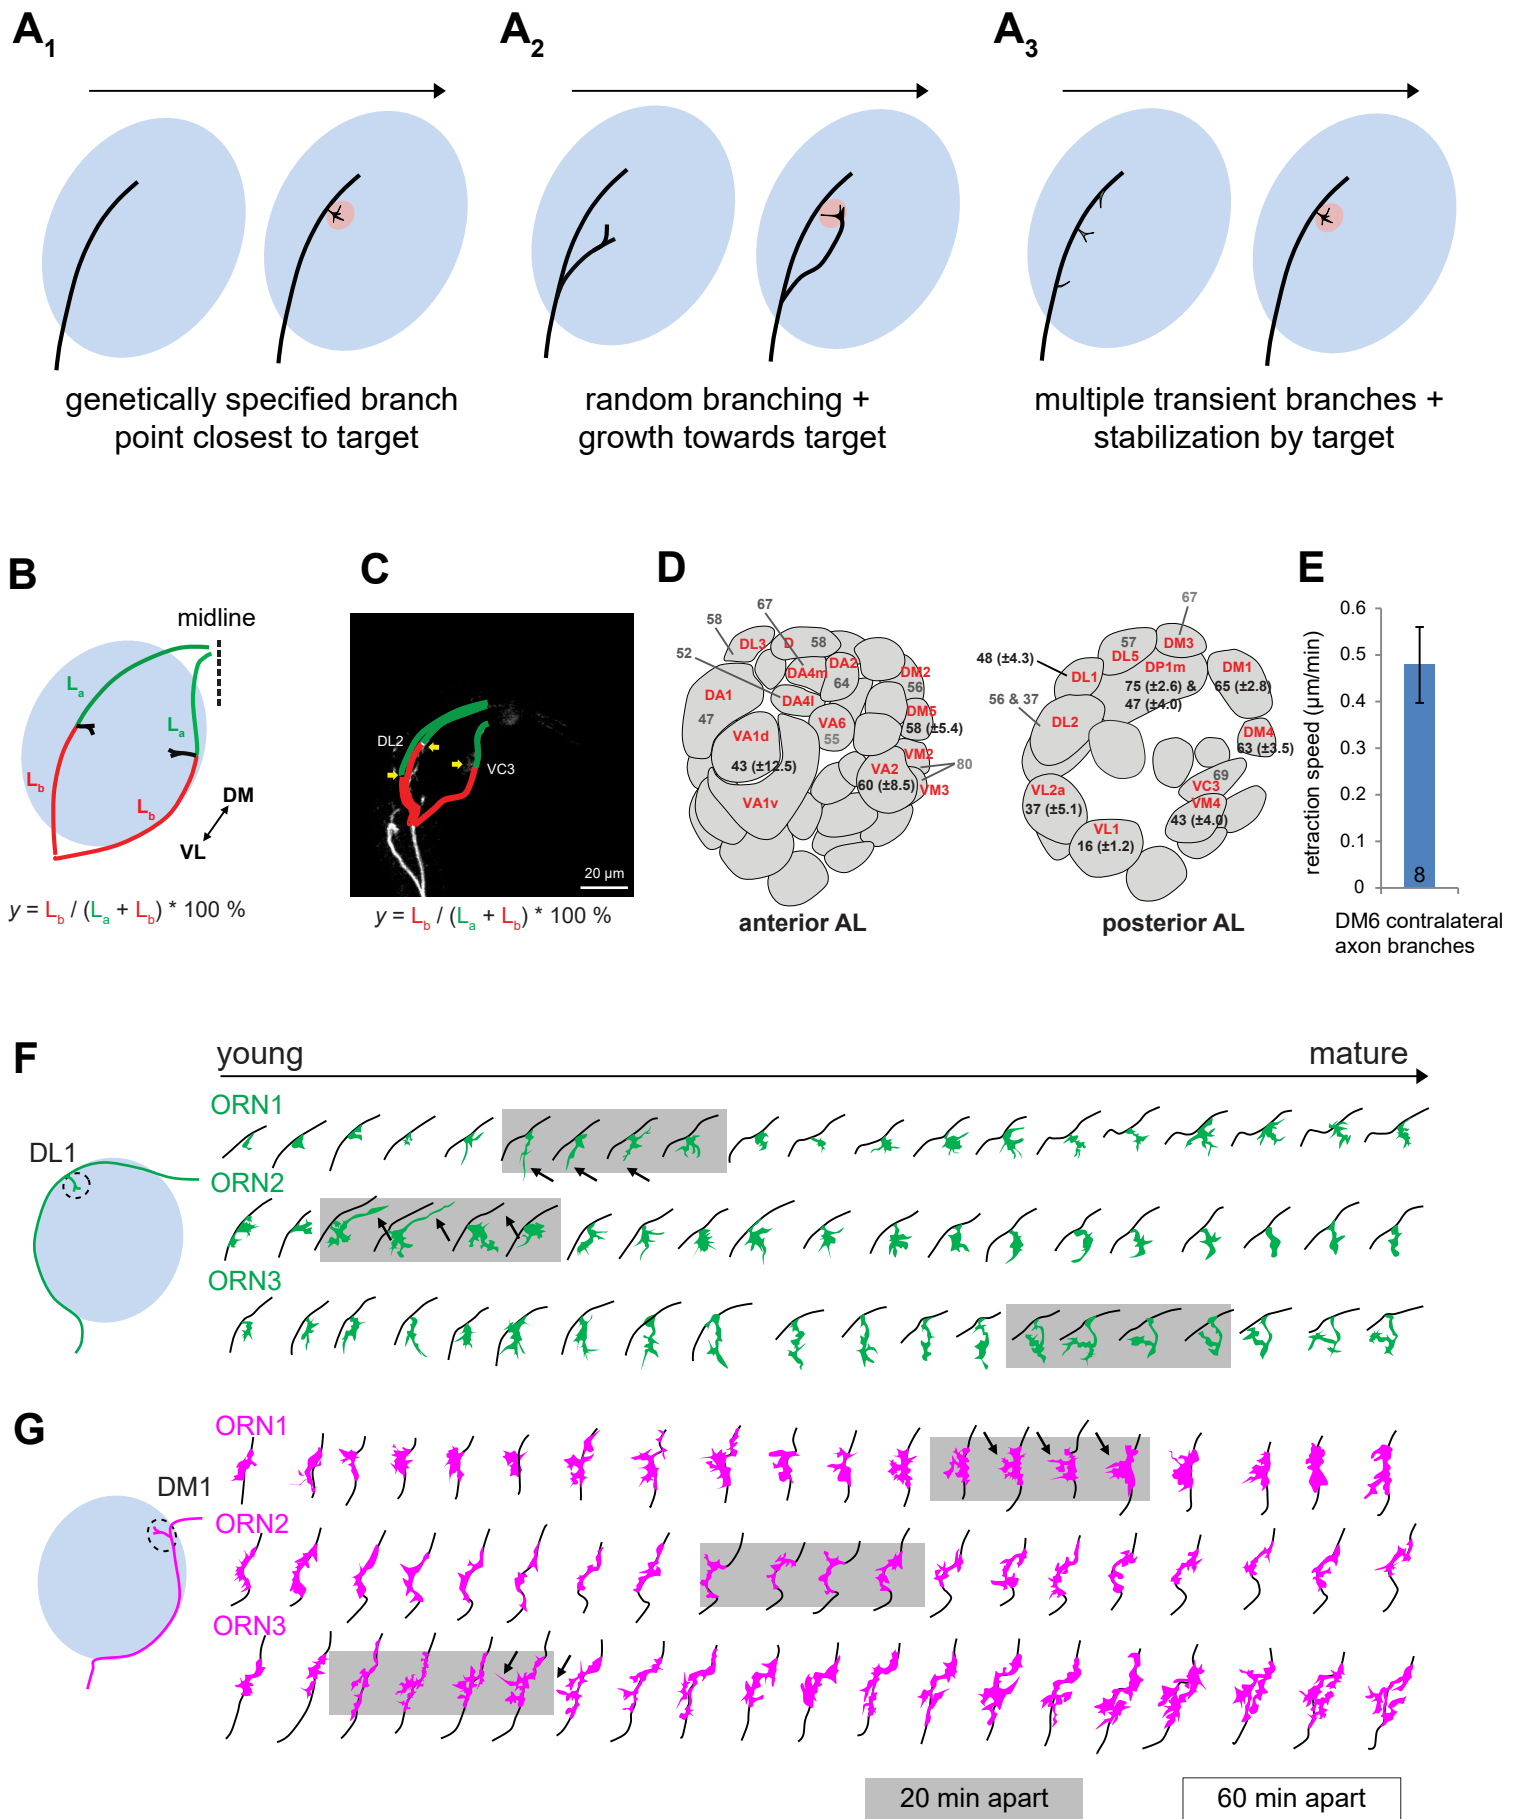

Supplement: NIHMS1736620-supplement-5.pdf [file NIHMS1736620-supplement-5.pdf]

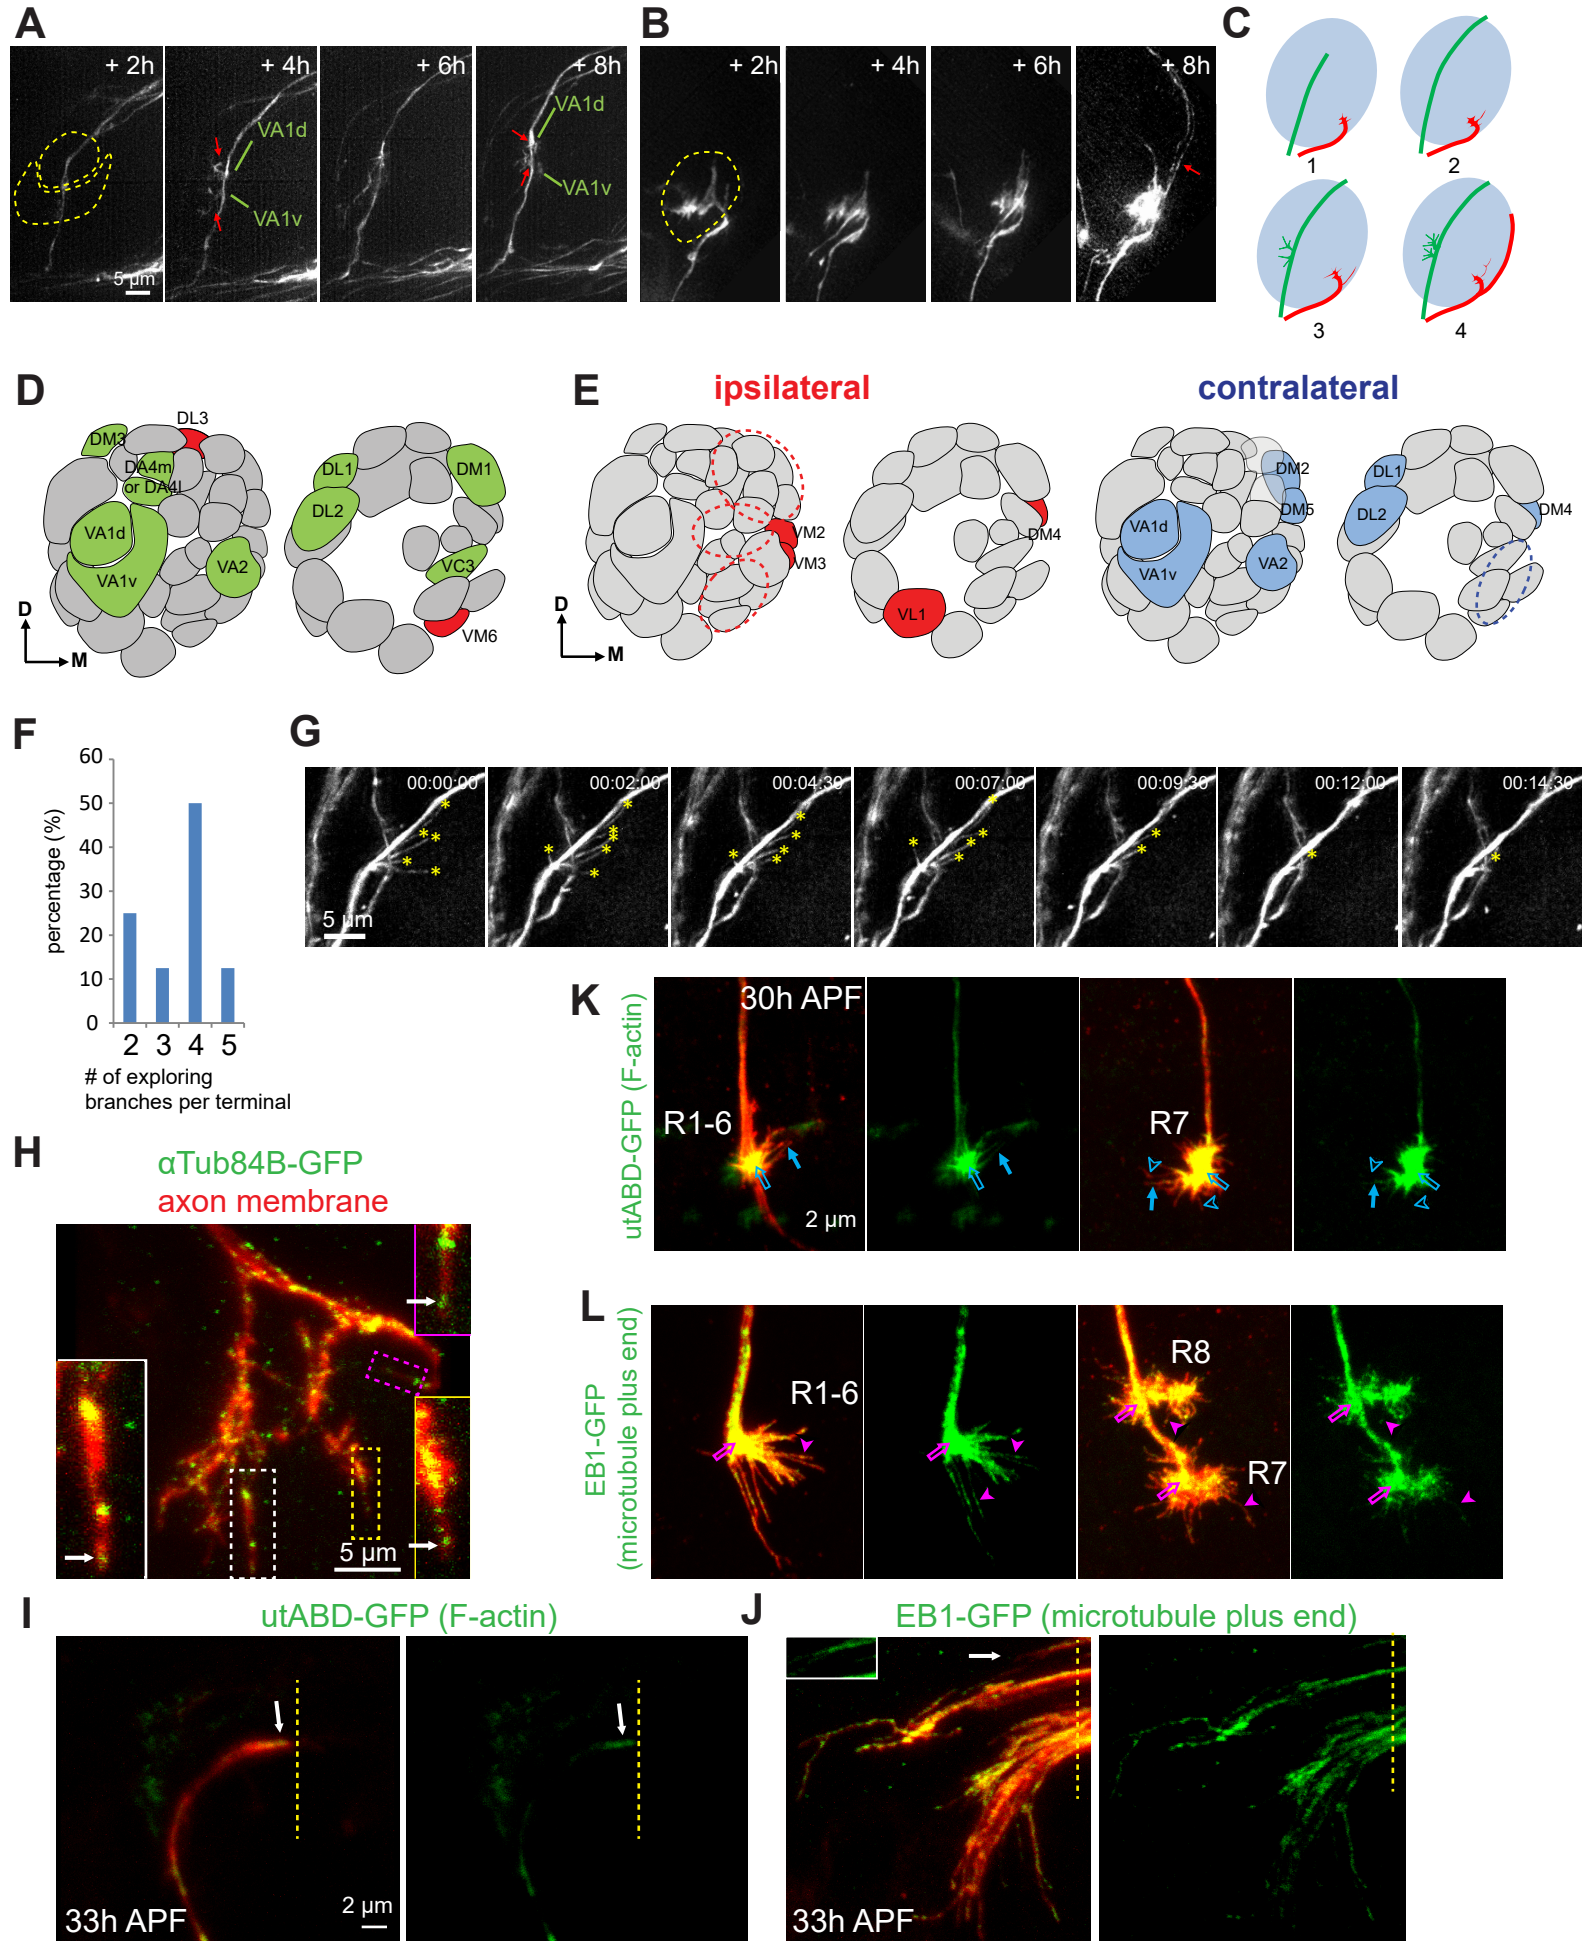

Supplement: NIHMS1736620-supplement-6.pdf [file NIHMS1736620-supplement-6.pdf]

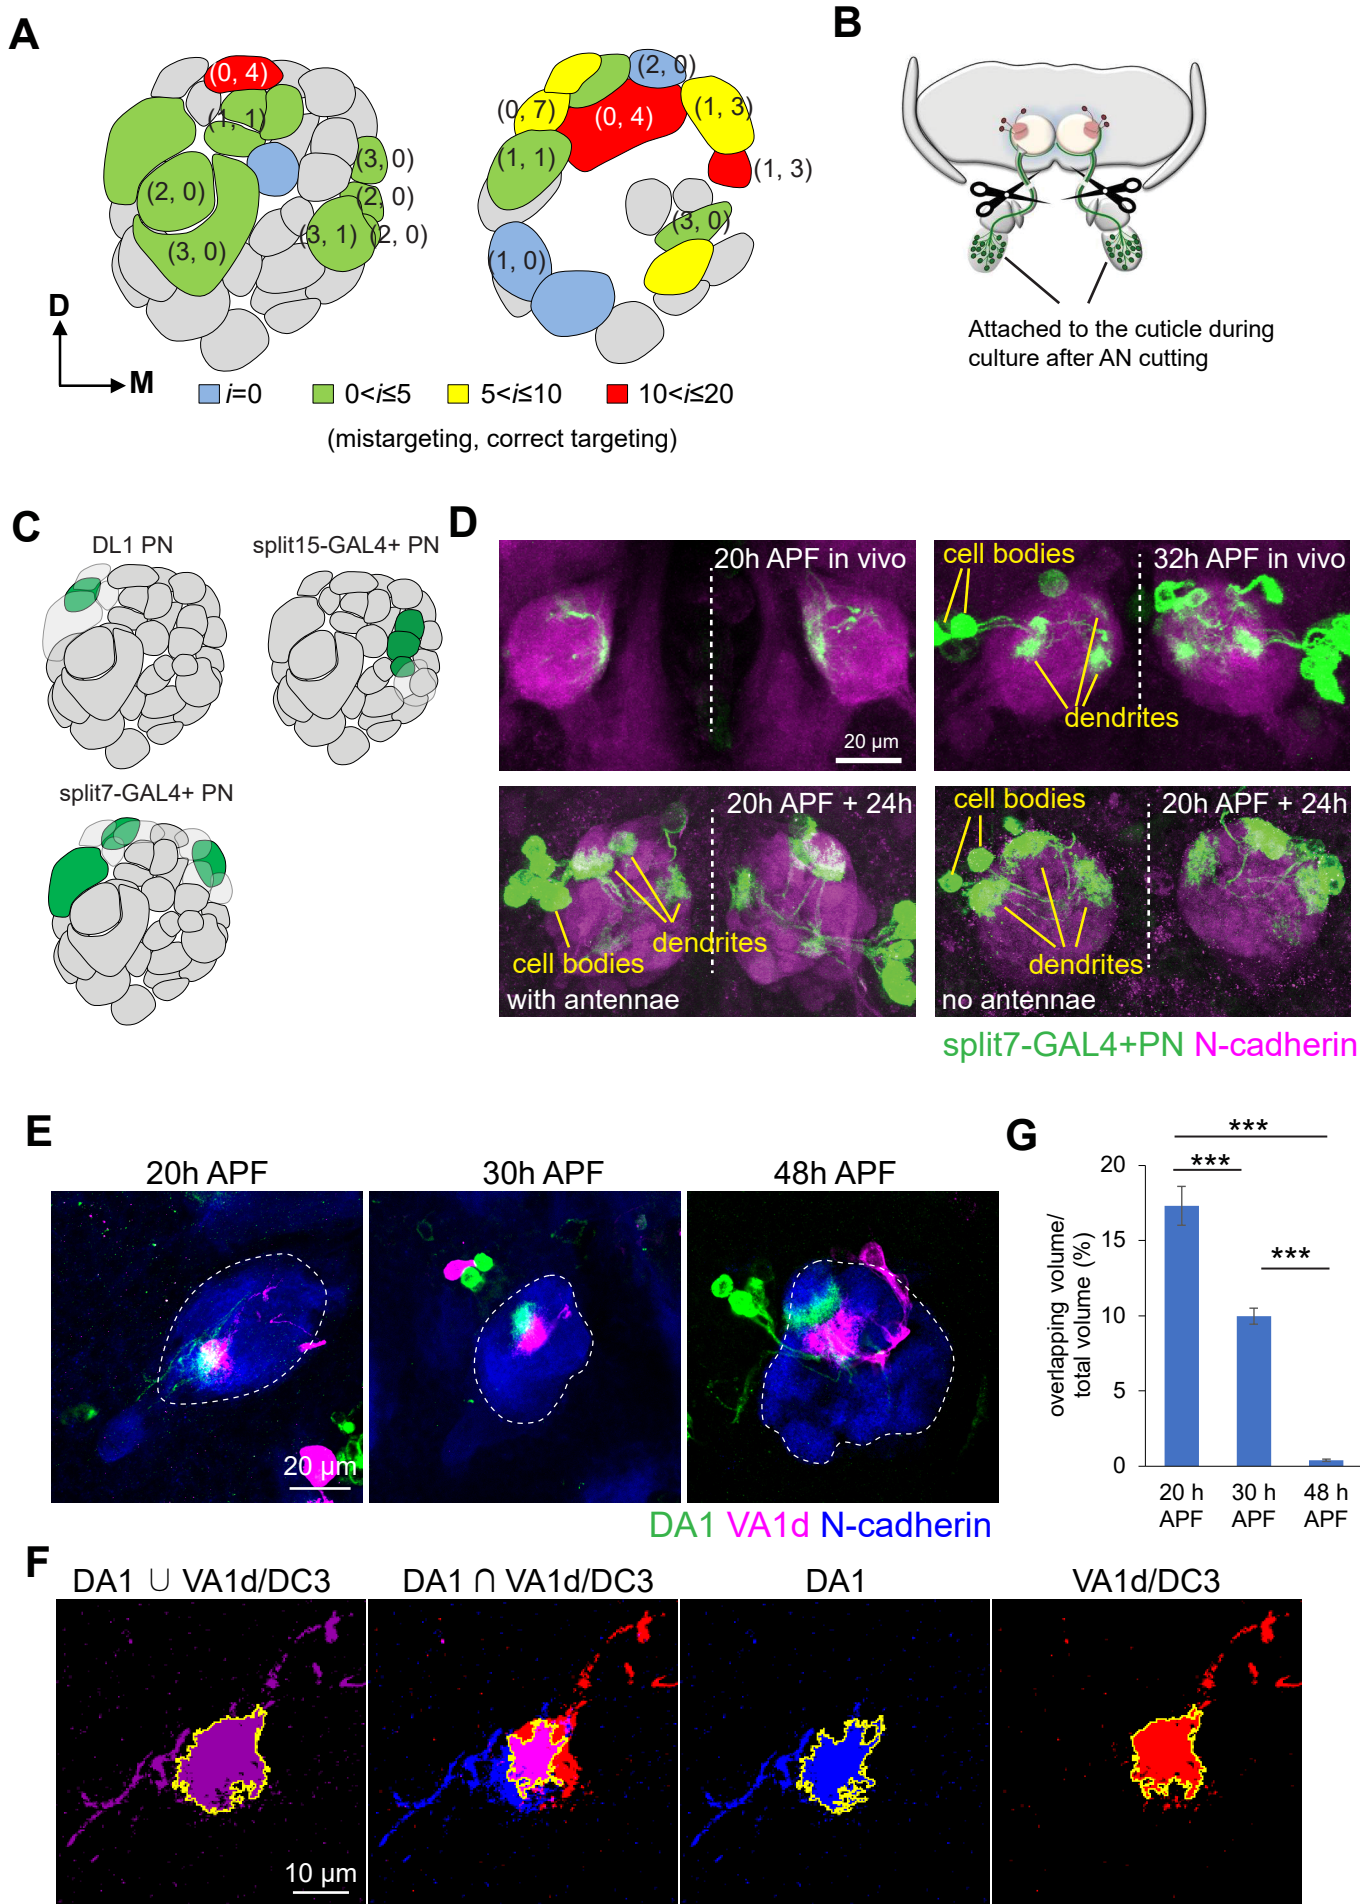

Supplement: NIHMS1736620-supplement-7.pdf [file NIHMS1736620-supplement-7.pdf]
